# Supplementary material for: Thermal activation of charge carriers in ionic and electronic semiconductor β-AgIVVO3 and β-AgIVVO3@VV1.6VIV0.4O4.8 composite xerogels
Source: Royal Society of Chemistry journal article supplement (doi:10.1039/c9ra04227j), 2019-01-01
Supplement: c9ra04227j1.pdf [file c9ra04227j1.pdf]

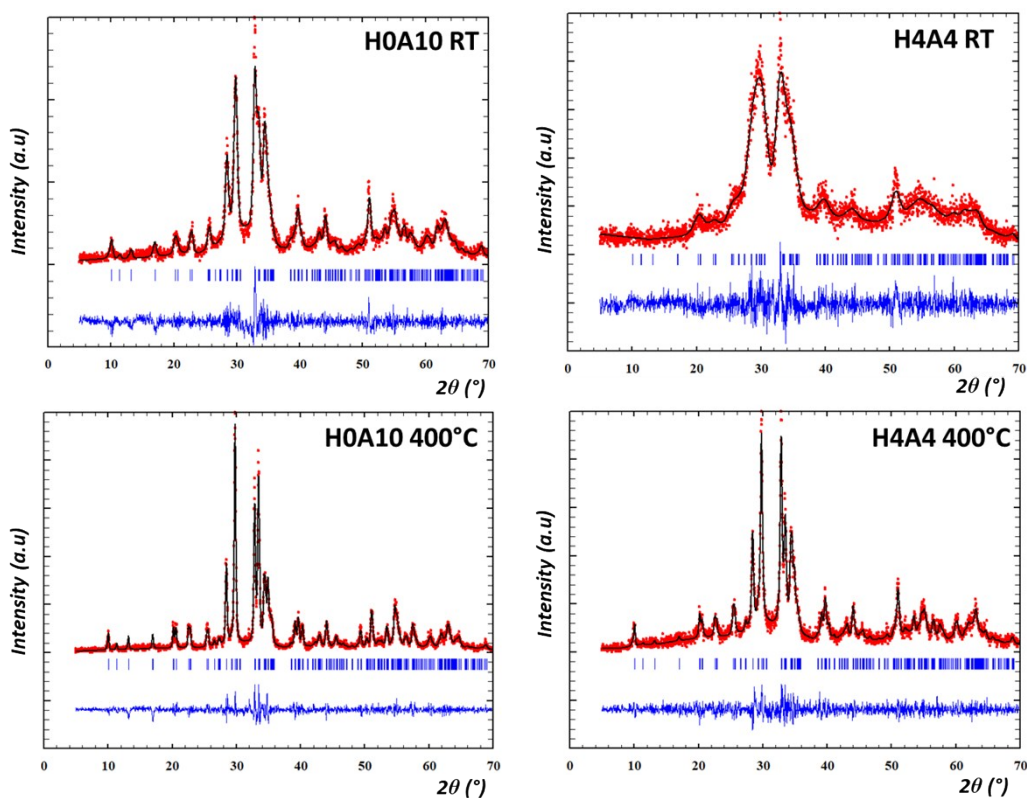

Figure S1.- Detail of the final fits for full profile pattern matching analyses of room temperature xerogels, and after heating them at 400°C.

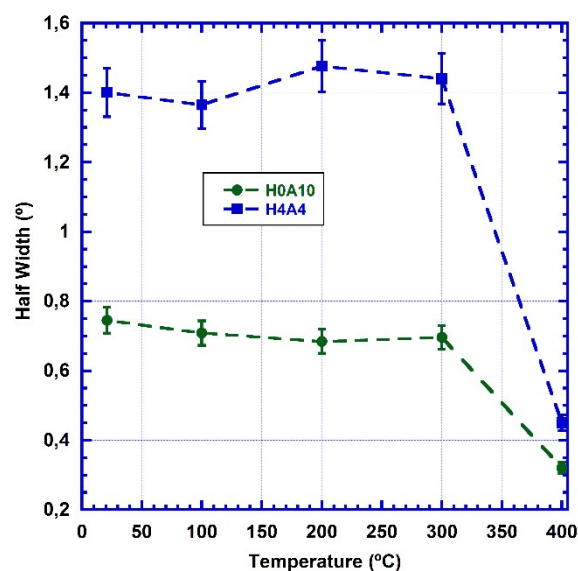

Figure S2.- Evolution of the Half width with the heat treatments of the samples. Half width parameter value has been obtained from profile analyses of the XRD patterns.

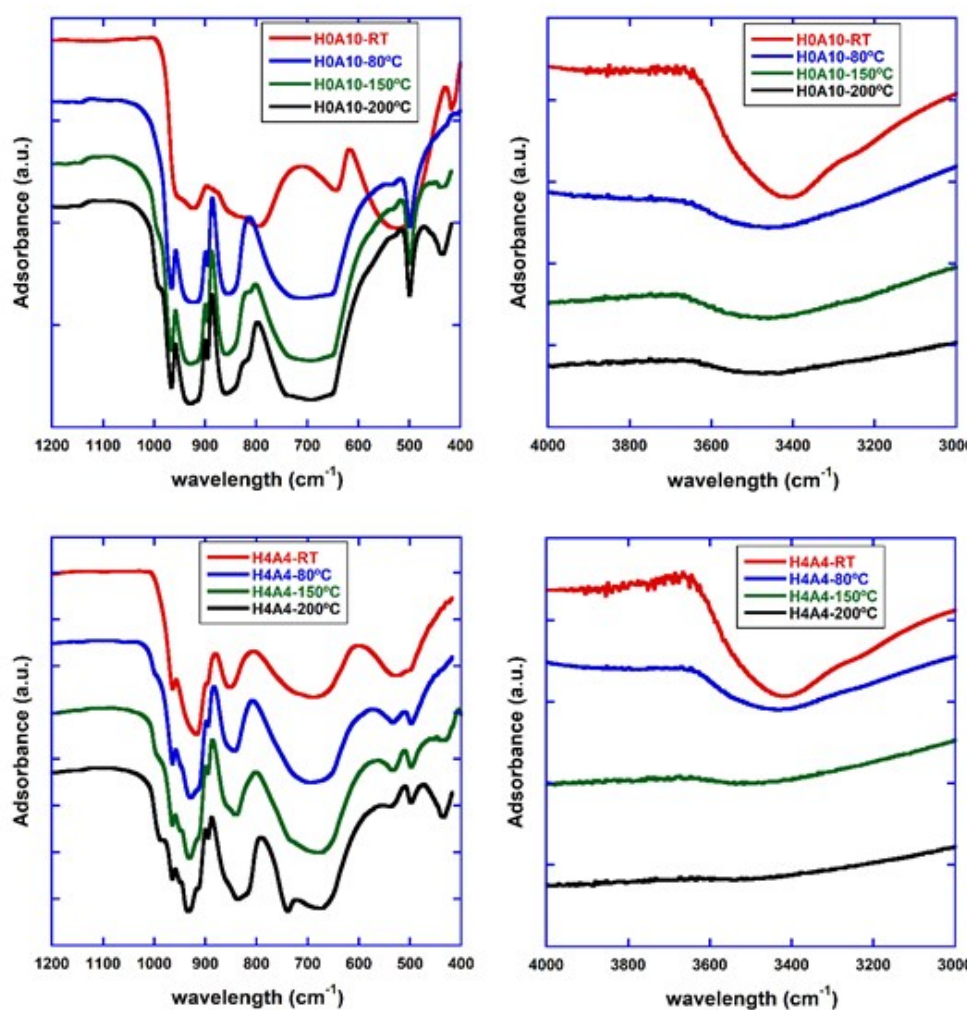

Figure S3.- Detailed IR spectra for as-synthesized H0A10 and H4A4 samples and after a two hours thermal annealing at 80°C, 150°C and 200°C.

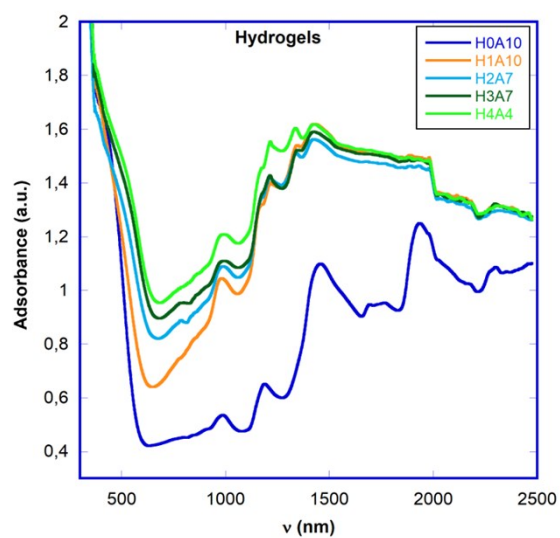

Figure S4.- UV-Vis of the SVO hydrogels and composite SVO@VO hydrogels

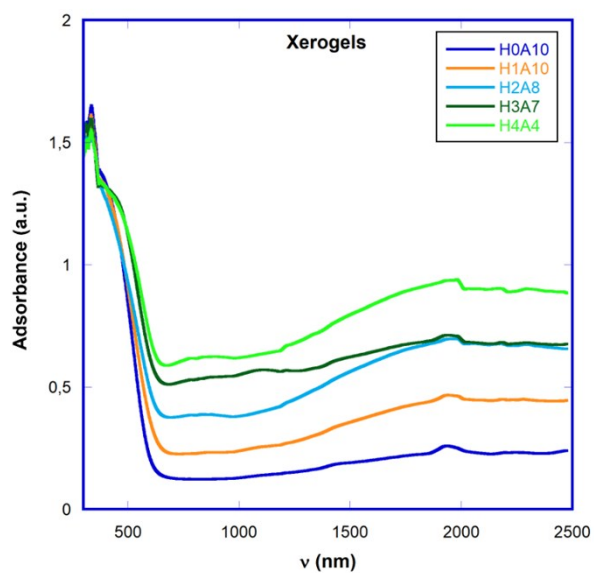

Figure S5.- UV-Vis of the SVO xerogels and composite SVO@VO xerogels.

Figure S.6.- (a) conductivity variation with time exposure to a water vapor atmosphere.  
 (b) complex plane Nyquist plot variation with time exposure to a water vapor atmosphere.

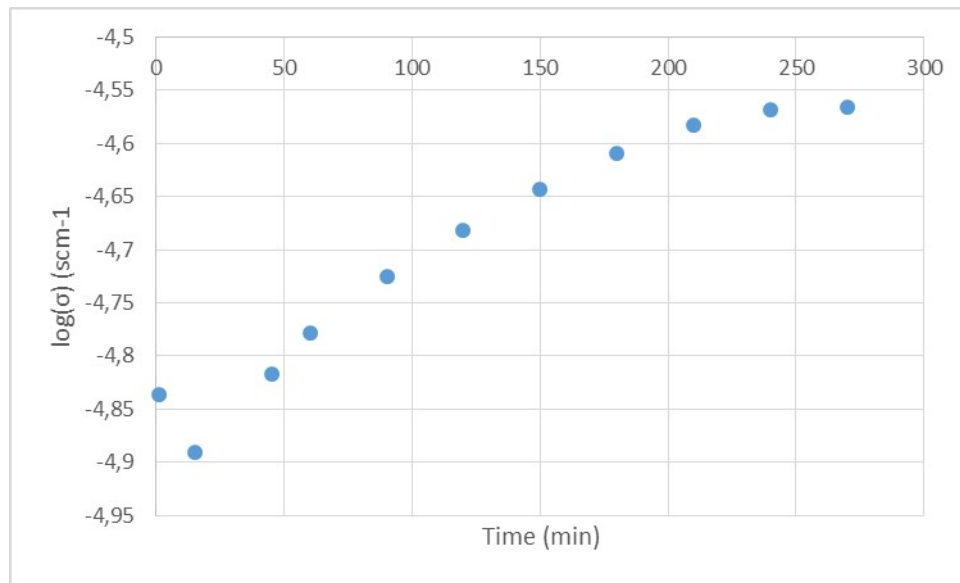

(a)

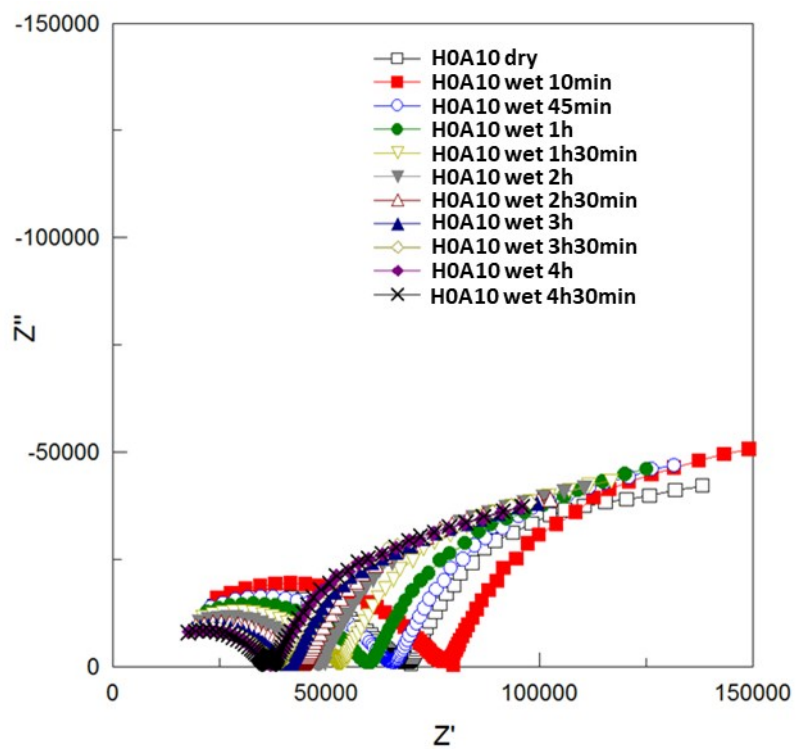

(b)
